# Supplementary material for: The Anti-Inflammatory Effect of Aptamin C on House Dust Mite Extract-Induced Inflammation in Keratinocytes via Regulation of IL-22 and GDNF Production
Source: MDPI journal article supplement (doi:10.3390/antiox10060945), 2021-06-11
Supplement: s1 [file s1]

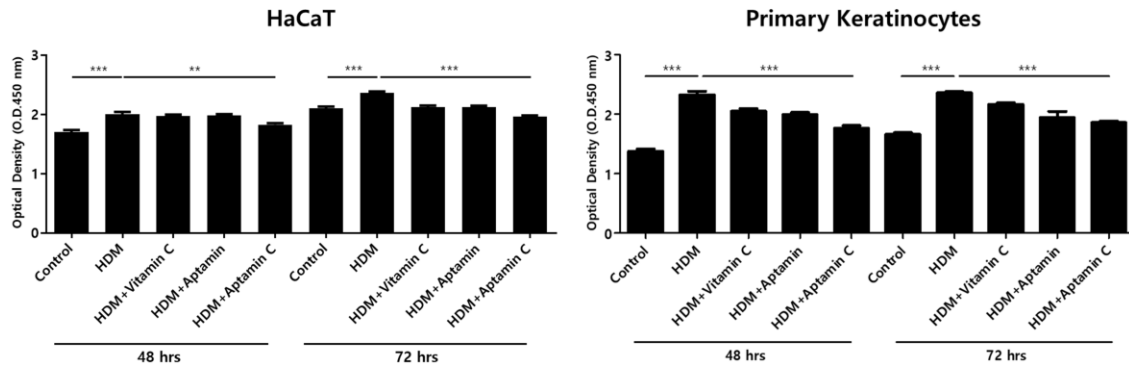

**Figure 1.** Proliferation of HaCaT and human keratinocytes induced by HDM extract was effectively suppressed by the treatment of Aptamin C.

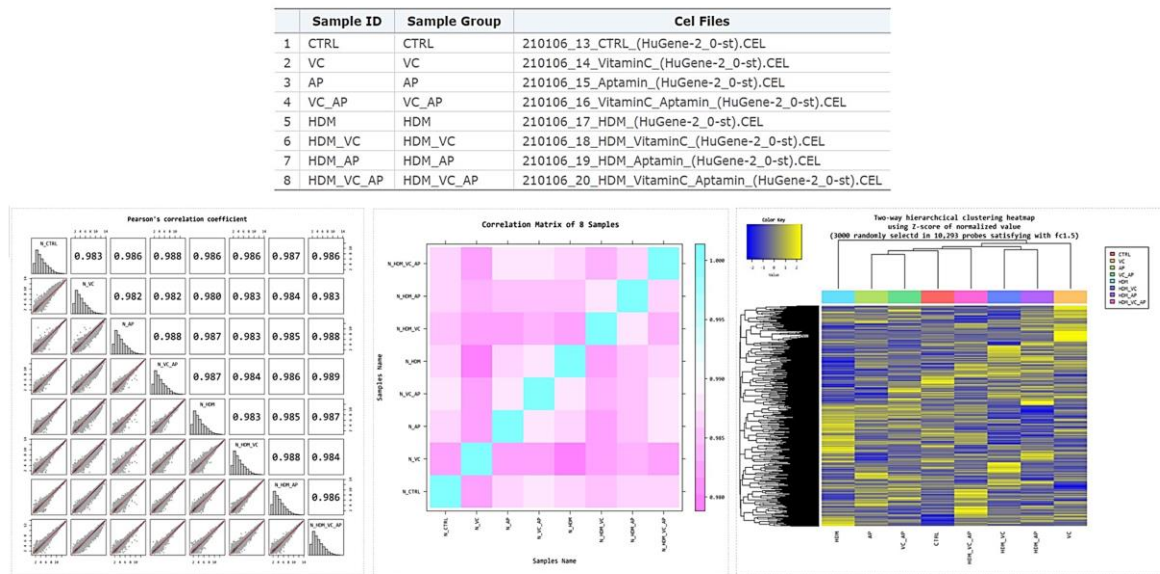

**Figure 2.** Gene expression profiling. Table and heatmap displays individual differentially expressed genes and the table depicts a subset of the largest Log<sub>2</sub> fold-change within HDM-induced sample Log<sub>2</sub> fold-change mean values.
